# Supplementary material for: First Insight into the Molecular Epidemiology ofMycobacterium tuberculosisIsolates from the Minority Enclaves of Southwestern China
Source: Hindawi journal article supplement (doi:10.1155/2017/2505172), 2017-01-01
Supplement: f1 [file 2505172.f1.pdf]

| ID   | Gender |
|------|--------|
| Y1   | Male   |
| Y8   | Male   |
| Y32  | Male   |
| Y36  | Male   |
| Y39  | Male   |
| Y40  | Female |
| Y44  | Male   |
| Y45  | Male   |
| Y49  | Male   |
| Y50  | Male   |
| Y51  | Male   |
| Y52  | Male   |
| Y53  | Male   |
| Y54  | Female |
| Y55  | Male   |
| Y58  | Male   |
| Y67  | Male   |
| Y71  | Male   |
| Y74  | Female |
| Y81  | Male   |
| Y83  | Male   |
| Y84  | Male   |
| Y86  | Male   |
| Y87  | Male   |
| Y89  | Female |
| Y90  | Male   |
| Y95  | Female |
| Y103 | Male   |
| Y104 | Male   |
| Y106 | Female |
| Y107 | Male   |
| Y108 | Male   |
| Y111 | Male   |
| Y114 | Male   |
| Y115 | Male   |
| Y122 | Male   |
| Y123 | Male   |
| Y129 | Female |
| Y130 | Male   |
| Y135 | Female |
| Y136 | Female |
| Y137 | Male   |
| Y138 | Female |
| Y139 | Female |
| Y140 | Female |
| Y141 | Female |

|      |        |
|------|--------|
| Y142 | Female |
| Y143 | Male   |
| Y144 | Female |
| Y145 | Male   |
| Y146 | Male   |
| Y147 | Male   |
| Y148 | Female |
| Y149 | Male   |
| Y150 | Male   |
| Y151 | Male   |
| Y152 | Male   |
| Y153 | Female |
| Y154 | Male   |
| Y155 | Male   |
| Y156 | Male   |
| Y157 | Female |
| Y158 | Male   |
| Y159 | Male   |
| Y160 | Female |
| Y161 | Male   |
| Y162 | Female |
| Y163 | Male   |
| Y164 | Female |
| Y165 | Female |
| Y167 | Male   |
| Y168 | Male   |
| Y169 | Female |
| Y170 | Male   |
| Y171 | Female |
| Y172 | Male   |
| Y173 | Female |
| Y174 | Male   |
| Y175 | Male   |
| Y176 | Female |
| Y177 | Male   |
| Y178 | Female |
| Y179 | Female |
| Y180 | Male   |
| Y181 | Male   |
| Y182 | Female |
| Y183 | Female |
| Y184 | Male   |
| Y185 | Male   |
| Y186 | Male   |
| Y188 | Female |
| Y189 | Female |
| Y190 | Male   |

|      |        |
|------|--------|
| Y191 | Male   |
| Y192 | Male   |
| Y195 | Male   |
| Y196 | Male   |
| Y197 | Male   |
| Y198 | Male   |
| Y199 | Male   |
| Y200 | Male   |
| Y202 | Male   |
| Y203 | Male   |
| Y204 | Male   |
| Y205 | Male   |
| Y206 | Male   |
| Y208 | Male   |
| Y209 | Male   |
| Y211 | Female |
| Y212 | Male   |
| Y213 | Male   |
| Y214 | Male   |
| Y215 | Male   |
| Y219 | Female |
| Y221 | Male   |
| Y222 | Male   |
| Y223 | Male   |
| Y226 | Female |
| Y229 | Male   |
| Y234 | Male   |
| Y240 | Male   |
| Y241 | Male   |
| Y242 | Female |
| Y243 | Male   |
| Y246 | Male   |
| Y249 | Male   |
| Y253 | Female |
| Y254 | Male   |
| Y255 | Female |
| Y258 | Female |
| Y264 | Male   |
| Y267 | Male   |
| Y269 | Male   |

| Age | Ethnicity |
|-----|-----------|
| 32  | Han       |
| 31  | Han       |
| 25  | Han       |
| 47  | Han       |
| 46  | Han       |
| 62  | Han       |
| 76  | Han       |
| 55  | Han       |
| 31  | Han       |
| 50  | Han       |
| 52  | Han       |
| 42  | Han       |
| 37  | Han       |
| 18  | Han       |
| 57  | Han       |
| 27  | Han       |
| 43  | Han       |
| 51  | Han       |
| 42  | Han       |
| 46  | Han       |
| 37  | Han       |
| 40  | Han       |
| 46  | Han       |
| 49  | Han       |
| 72  | Han       |
| 82  | Han       |
| 43  | Han       |
| 33  | Han       |
| 31  | Han       |
| 22  | Han       |
| 50  | Han       |
| 43  | Han       |
| 33  | Han       |
| 18  | Han       |
| 40  | Han       |
| 50  | Han       |
| 34  | Han       |
| 28  | Han       |
| 42  | Han       |
| 39  | Han       |
| 36  | Han       |
| 30  | Han       |
| 16  | Han       |
| 39  | Han       |
| 40  | Han       |
| 36  | Han       |

|    |     |
|----|-----|
| 29 | Han |
| 67 | Han |
| 22 | Han |
| 20 | Han |
| 55 | Han |
| 39 | Han |
| 18 | Han |
| 60 | Han |
| 40 | Han |
| 66 | Han |
| 20 | Han |
| 24 | Han |
| 42 | Han |
| 68 | Han |
| 48 | Han |
| 36 | Han |
| 49 | Han |
| 75 | Han |
| 69 | Han |
| 17 | Han |
| 42 | Han |
| 22 | Han |
| 71 | Han |
| 22 | Han |
| 15 | Han |
| 35 | Han |
| 75 | Han |
| 52 | Han |
| 29 | Han |
| 46 | Han |
| 57 | Han |
| 33 | Han |
| 35 | Han |
| 18 | Han |
| 24 | Han |
| 33 | Han |
| 32 | Han |
| 23 | Han |
| 20 | Han |
| 45 | Han |
| 61 | Han |
| 47 | Han |
| 51 | Han |
| 41 | Han |
| 49 | Han |
| 41 | Han |
| 48 | Han |

|    |     |
|----|-----|
| 47 | Han |
| 30 | Han |
| 17 | Han |
| 43 | Han |
| 57 | Han |
| 31 | Han |
| 23 | Han |
| 38 | Han |
| 55 | Han |
| 51 | Han |
| 42 | Han |
| 31 | Han |
| 28 | Han |
| 55 | Han |
| 48 | Han |
| 49 | Han |
| 48 | Han |
| 46 | Han |
| 51 | Han |
| 28 | Han |
| 61 | Han |
| 40 | Han |
| 50 | Han |
| 66 | Han |
| 24 | Han |
| 45 | Han |
| 48 | Han |
| 65 | Han |
| 52 | Han |
| 22 | Han |
| 30 | Han |
| 32 | Han |
| 51 | Han |
| 40 | Han |
| 59 | Han |
| 61 | Han |
| 27 | Han |
| 28 | Han |
| 68 | Han |
| 47 | Han |



|         |           |
|---------|-----------|
| Qujing  | New case  |
| Qujing  | New case  |
| Qujing  | New case  |
| Qujing  | New case  |
| Qujing  | New case  |
| Qujing  | New case  |
| Qujing  | New case  |
| Qujing  | New case  |
| Qujing  | New case  |
| Qujing  | New case  |
| Qujing  | New case  |
| Qujing  | New case  |
| Qujing  | New case  |
| Qujing  | Retreated |
| Qujing  | New case  |
| Qujing  | New case  |
| Qujing  | New case  |
| Qujing  | New case  |
| Qujing  | Retreated |
| Qujing  | New case  |
| Qujing  | New case  |
| Qujing  | New case  |
| Qujing  | New case  |
| Qujing  | New case  |
| Qujing  | New case  |
| Qujing  | New case  |
| Qujing  | New case  |
| Qujing  | New case  |
| Qujing  | New case  |
| Qujing  | New case  |
| Qujing  | New case  |
| Qujing  | New case  |
| Qujing  | Retreated |
| Qujing  | New case  |
| Qujing  | New case  |
| Qujing  | New case  |
| Qujing  | New case  |
| Qujing  | New case  |
| Qujing  | New case  |
| Qujing  | New case  |
| Qujing  | New case  |
| Qujing  | New case  |
| Qujing  | New case  |
| Qujing  | New case  |
| Qujing  | New case  |
| Qujing  | New case  |
| Qujing  | New case  |
| Qujing  | New case  |
| Qujing  | New case  |
| Qujing  | New case  |
| Qujing  | New case  |
| Qujing  | New case  |
| Lincang | New case  |
| Lincang | New case  |
| Lincang | Retreated |
| Lincang | New case  |
| Lincang | New case  |



|         |           |
|---------|-----------|
| Lincang | Retreated |
| Lincang | New case  |
| Lincang | New case  |
| Lincang | New case  |
| Lincang | New case  |
| Lincang | New case  |
| Lincang | New case  |
| Lincang | New case  |
| Lincang | New case  |
| Lincang | New case  |
| Lincang | New case  |
| Lincang | New case  |
| Lincang | New case  |
| Lincang | New case  |
| Lincang | Retreated |
| Lincang | New case  |
| Lincang | Retreated |
| Lincang | New case  |
| Lincang | New case  |
| Lincang | New case  |
| Lincang | New case  |
| Lincang | New case  |
| Lincang | New case  |
| Lijiang | New case  |
| Lijiang | Retreated |
| Lijiang | New case  |
| Lijiang | New case  |
| Lijiang | New case  |
| Lijiang | New case  |
| Puer    | Retreated |
| Puer    | New case  |
| Puer    | New case  |
| Puer    | Retreated |
| Puer    | New case  |
| Puer    | New case  |
| Puer    | New case  |
| Puer    | New case  |
| Puer    | New case  |
| Puer    | New case  |
| Puer    | New case  |
| Puer    | New case  |
| Puer    | New case  |
| Lijiang | New case  |
| Lijiang | New case  |







| Spoligo 1 | Spoligo 2 |
|-----------|-----------|
| 1         | 1         |
| 0         | 0         |
| 1         | 1         |
| 1         | 1         |
| 0         | 0         |
| 1         | 1         |
| 1         | 1         |
| 0         | 0         |
| 0         | 0         |
| 1         | 1         |
| 1         | 1         |
| 0         | 0         |
| 1         | 1         |
| 0         | 0         |
| 1         | 1         |
| 1         | 1         |
| 1         | 1         |
| 1         | 1         |
| 0         | 0         |
| 0         | 0         |
| 0         | 0         |
| 1         | 1         |
| 1         | 1         |
| 0         | 0         |
| 1         | 1         |
| 1         | 1         |
| 0         | 0         |
| 0         | 0         |
| 0         | 0         |
| 1         | 1         |
| 1         | 1         |
| 0         | 0         |
| 1         | 1         |
| 1         | 1         |
| 0         | 0         |
| 0         | 0         |
| 0         | 0         |
| 0         | 0         |
| 1         | 1         |
| 1         | 1         |
| 0         | 0         |
| 0         | 0         |
| 0         | 0         |
| 1         | 1         |
| 0         | 0         |
| 0         | 0         |
| 0         | 0         |
| 0         | 0         |
| 0         | 0         |
| 0         | 0         |
| 0         | 0         |
| 0         | 0         |
| 0         | 0         |
| 0         | 0         |
| 0         | 0         |
| 0         | 0         |
| 0         | 0         |
| 0         | 0         |
| 0         | 0         |
| 0         | 0         |
| 0         | 0         |
| 0         | 0         |
| 0         | 0         |
| 0         | 0         |
| 0         | 0         |

|   |   |
|---|---|
| 0 | 0 |
| 0 | 0 |
| 0 | 0 |
| 0 | 0 |
| 0 | 0 |
| 1 | 1 |
| 0 | 0 |
| 0 | 0 |
| 0 | 0 |
| 0 | 0 |
| 0 | 0 |
| 0 | 0 |
| 0 | 0 |
| 0 | 0 |
| 0 | 0 |
| 0 | 0 |
| 0 | 0 |
| 0 | 0 |
| 0 | 0 |
| 1 | 1 |
| 0 | 0 |
| 1 | 1 |
| 0 | 0 |
| 0 | 0 |
| 0 | 0 |
| 0 | 0 |
| 0 | 0 |
| 0 | 0 |
| 0 | 0 |
| 0 | 0 |
| 0 | 0 |
| 0 | 0 |
| 0 | 0 |
| 0 | 0 |
| 0 | 0 |
| 0 | 0 |
| 0 | 0 |
| 0 | 0 |
| 0 | 0 |
| 1 | 1 |
| 1 | 1 |
| 0 | 0 |
| 0 | 0 |
| 0 | 0 |
| 0 | 0 |
| 1 | 1 |
| 1 | 1 |
| 1 | 1 |
| 1 | 1 |
| 0 | 0 |

|   |   |
|---|---|
| 1 | 1 |
| 0 | 0 |
| 0 | 0 |
| 1 | 1 |
| 0 | 0 |
| 1 | 1 |
| 0 | 0 |
| 0 | 0 |
| 1 | 1 |
| 1 | 1 |
| 1 | 1 |
| 0 | 0 |
| 0 | 0 |
| 1 | 1 |
| 0 | 0 |
| 1 | 1 |
| 0 | 0 |
| 1 | 1 |
| 1 | 1 |
| 1 | 1 |
| 1 | 1 |
| 1 | 1 |
| 0 | 0 |
| 0 | 0 |
| 1 | 1 |
| 1 | 1 |
| 1 | 1 |
| 1 | 1 |
| 0 | 0 |
| 0 | 0 |
| 0 | 1 |
| 1 | 1 |
| 0 | 0 |
| 1 | 1 |
| 0 | 0 |
| 0 | 0 |
| 0 | 0 |
| 1 | 1 |
| 1 | 1 |
| 1 | 1 |





|   |   |
|---|---|
| 0 | 0 |
| 0 | 0 |
| 0 | 0 |
| 0 | 0 |
| 0 | 0 |
| 1 | 1 |
| 0 | 0 |
| 0 | 0 |
| 0 | 0 |
| 0 | 0 |
| 0 | 0 |
| 0 | 0 |
| 0 | 0 |
| 0 | 0 |
| 0 | 0 |
| 0 | 0 |
| 0 | 0 |
| 0 | 0 |
| 0 | 0 |
| 0 | 0 |
| 1 | 1 |
| 0 | 0 |
| 1 | 1 |
| 0 | 0 |
| 0 | 0 |
| 0 | 0 |
| 0 | 0 |
| 0 | 0 |
| 0 | 0 |
| 0 | 0 |
| 0 | 0 |
| 0 | 0 |
| 0 | 0 |
| 0 | 0 |
| 0 | 0 |
| 0 | 0 |
| 1 | 1 |
| 1 | 1 |
| 0 | 0 |
| 0 | 0 |
| 0 | 0 |
| 0 | 0 |
| 1 | 1 |
| 1 | 1 |
| 1 | 1 |
| 1 | 1 |
| 0 | 0 |

|   |   |
|---|---|
| 1 | 1 |
| 0 | 0 |
| 0 | 0 |
| 1 | 1 |
| 0 | 0 |
| 1 | 1 |
| 0 | 0 |
| 0 | 0 |
| 1 | 1 |
| 1 | 1 |
| 1 | 1 |
| 0 | 0 |
| 0 | 0 |
| 1 | 1 |
| 0 | 0 |
| 1 | 1 |
| 0 | 0 |
| 1 | 1 |
| 1 | 1 |
| 1 | 1 |
| 1 | 1 |
| 1 | 1 |
| 0 | 0 |
| 0 | 0 |
| 1 | 1 |
| 1 | 1 |
| 1 | 1 |
| 1 | 1 |
| 0 | 0 |
| 0 | 0 |
| 1 | 1 |
| 1 | 1 |
| 0 | 0 |
| 0 | 0 |
| 0 | 0 |
| 1 | 1 |
| 1 | 1 |
| 1 | 1 |



|   |   |
|---|---|
| 0 | 0 |
| 0 | 0 |
| 0 | 0 |
| 0 | 0 |
| 0 | 0 |
| 1 | 1 |
| 0 | 0 |
| 0 | 0 |
| 0 | 0 |
| 0 | 0 |
| 0 | 0 |
| 0 | 0 |
| 0 | 0 |
| 0 | 0 |
| 0 | 0 |
| 0 | 0 |
| 0 | 0 |
| 0 | 0 |
| 1 | 1 |
| 0 | 0 |
| 1 | 1 |
| 0 | 0 |
| 0 | 0 |
| 0 | 0 |
| 0 | 0 |
| 0 | 0 |
| 0 | 0 |
| 0 | 0 |
| 0 | 0 |
| 0 | 0 |
| 0 | 0 |
| 0 | 0 |
| 0 | 0 |
| 0 | 0 |
| 0 | 0 |
| 1 | 1 |
| 1 | 1 |
| 0 | 0 |
| 0 | 0 |
| 0 | 0 |
| 0 | 0 |
| 1 | 1 |
| 1 | 1 |
| 1 | 1 |
| 1 | 1 |
| 0 | 0 |

|   |   |
|---|---|
| 1 | 1 |
| 0 | 0 |
| 0 | 0 |
| 1 | 1 |
| 0 | 0 |
| 1 | 1 |
| 0 | 0 |
| 0 | 0 |
| 1 | 1 |
| 1 | 1 |
| 1 | 1 |
| 0 | 0 |
| 0 | 0 |
| 1 | 1 |
| 0 | 0 |
| 1 | 1 |
| 0 | 0 |
| 1 | 1 |
| 1 | 1 |
| 1 | 1 |
| 1 | 1 |
| 1 | 1 |
| 0 | 0 |
| 0 | 0 |
| 1 | 1 |
| 1 | 1 |
| 1 | 1 |
| 1 | 1 |
| 0 | 0 |
| 0 | 0 |
| 1 | 1 |
| 1 | 1 |
| 0 | 0 |
| 0 | 1 |
| 0 | 0 |
| 0 | 0 |
| 0 | 0 |
| 1 | 1 |
| 1 | 1 |
| 1 | 1 |



|   |   |
|---|---|
| 0 | 0 |
| 0 | 0 |
| 0 | 0 |
| 0 | 0 |
| 0 | 0 |
| 1 | 1 |
| 0 | 0 |
| 0 | 0 |
| 0 | 0 |
| 0 | 0 |
| 0 | 0 |
| 0 | 0 |
| 0 | 0 |
| 0 | 0 |
| 0 | 0 |
| 0 | 0 |
| 0 | 0 |
| 0 | 0 |
| 1 | 1 |
| 0 | 0 |
| 1 | 1 |
| 0 | 0 |
| 0 | 0 |
| 0 | 0 |
| 0 | 0 |
| 0 | 0 |
| 0 | 0 |
| 0 | 0 |
| 0 | 0 |
| 0 | 0 |
| 0 | 0 |
| 0 | 0 |
| 0 | 0 |
| 0 | 0 |
| 0 | 0 |
| 0 | 0 |
| 0 | 0 |
| 0 | 0 |
| 0 | 0 |
| 1 | 1 |
| 1 | 1 |
| 0 | 0 |
| 0 | 0 |
| 0 | 0 |
| 0 | 0 |
| 1 | 1 |
| 1 | 1 |
| 1 | 1 |
| 1 | 1 |
| 0 | 0 |

|   |   |
|---|---|
| 1 | 1 |
| 0 | 0 |
| 0 | 0 |
| 1 | 1 |
| 0 | 0 |
| 1 | 1 |
| 0 | 0 |
| 0 | 0 |
| 0 | 1 |
| 1 | 1 |
| 1 | 1 |
| 0 | 0 |
| 0 | 0 |
| 0 | 1 |
| 0 | 0 |
| 1 | 1 |
| 0 | 0 |
| 0 | 1 |
| 1 | 1 |
| 1 | 1 |
| 1 | 1 |
| 1 | 1 |
| 1 | 1 |
| 0 | 0 |
| 0 | 0 |
| 1 | 1 |
| 1 | 1 |
| 1 | 1 |
| 1 | 1 |
| 0 | 0 |
| 0 | 0 |
| 1 | 1 |
| 1 | 1 |
| 0 | 0 |
| 0 | 0 |
| 0 | 0 |
| 1 | 1 |
| 1 | 1 |
| 1 | 1 |





|   |   |
|---|---|
| 0 | 0 |
| 0 | 0 |
| 0 | 0 |
| 0 | 0 |
| 0 | 0 |
| 1 | 1 |
| 0 | 0 |
| 0 | 0 |
| 0 | 0 |
| 0 | 0 |
| 0 | 0 |
| 0 | 0 |
| 0 | 0 |
| 0 | 0 |
| 0 | 0 |
| 0 | 0 |
| 0 | 0 |
| 0 | 0 |
| 0 | 0 |
| 0 | 0 |
| 1 | 1 |
| 0 | 0 |
| 1 | 1 |
| 0 | 0 |
| 0 | 0 |
| 0 | 0 |
| 0 | 0 |
| 0 | 0 |
| 0 | 0 |
| 0 | 0 |
| 0 | 0 |
| 0 | 0 |
| 0 | 0 |
| 0 | 0 |
| 0 | 0 |
| 0 | 0 |
| 0 | 0 |
| 1 | 1 |
| 1 | 1 |
| 0 | 0 |
| 0 | 0 |
| 0 | 0 |
| 0 | 0 |
| 1 | 1 |
| 1 | 1 |
| 1 | 1 |
| 1 | 1 |
| 0 | 0 |

|   |   |
|---|---|
| 1 | 1 |
| 0 | 0 |
| 0 | 0 |
| 1 | 1 |
| 0 | 0 |
| 1 | 1 |
| 0 | 0 |
| 0 | 0 |
| 1 | 1 |
| 1 | 1 |
| 1 | 1 |
| 0 | 0 |
| 0 | 0 |
| 1 | 1 |
| 0 | 0 |
| 1 | 1 |
| 0 | 0 |
| 1 | 1 |
| 1 | 1 |
| 1 | 1 |
| 1 | 1 |
| 1 | 1 |
| 0 | 0 |
| 0 | 0 |
| 1 | 1 |
| 1 | 1 |
| 1 | 1 |
| 1 | 1 |
| 0 | 0 |
| 0 | 0 |
| 1 | 1 |
| 1 | 1 |
| 0 | 0 |
| 0 | 0 |
| 0 | 0 |
| 1 | 1 |
| 1 | 1 |
| 1 | 1 |



|   |   |
|---|---|
| 0 | 0 |
| 0 | 0 |
| 0 | 0 |
| 0 | 0 |
| 0 | 0 |
| 1 | 1 |
| 0 | 0 |
| 0 | 0 |
| 0 | 0 |
| 0 | 0 |
| 0 | 0 |
| 0 | 0 |
| 0 | 0 |
| 0 | 0 |
| 0 | 0 |
| 0 | 0 |
| 0 | 0 |
| 0 | 0 |
| 1 | 0 |
| 0 | 0 |
| 1 | 1 |
| 0 | 0 |
| 0 | 0 |
| 0 | 0 |
| 0 | 0 |
| 0 | 0 |
| 0 | 0 |
| 0 | 0 |
| 0 | 0 |
| 0 | 0 |
| 0 | 0 |
| 0 | 0 |
| 0 | 0 |
| 0 | 0 |
| 0 | 0 |
| 1 | 1 |
| 1 | 1 |
| 0 | 0 |
| 0 | 0 |
| 0 | 0 |
| 0 | 0 |
| 1 | 0 |
| 1 | 1 |
| 0 | 0 |
| 0 | 0 |
| 0 | 0 |
| 1 | 1 |
| 1 | 1 |
| 1 | 1 |
| 1 | 1 |
| 0 | 0 |

|   |   |
|---|---|
| 1 | 1 |
| 0 | 0 |
| 0 | 0 |
| 1 | 1 |
| 0 | 0 |
| 1 | 1 |
| 0 | 0 |
| 0 | 0 |
| 1 | 1 |
| 1 | 1 |
| 1 | 1 |
| 0 | 0 |
| 0 | 0 |
| 1 | 1 |
| 0 | 0 |
| 1 | 1 |
| 0 | 0 |
| 1 | 1 |
| 1 | 1 |
| 1 | 1 |
| 1 | 1 |
| 1 | 1 |
| 0 | 0 |
| 0 | 0 |
| 1 | 1 |
| 1 | 1 |
| 1 | 1 |
| 1 | 1 |
| 0 | 0 |
| 0 | 0 |
| 1 | 1 |
| 1 | 1 |
| 0 | 0 |
| 0 | 0 |
| 0 | 0 |
| 1 | 1 |
| 1 | 1 |
| 1 | 1 |



|   |   |
|---|---|
| 0 | 0 |
| 0 | 0 |
| 0 | 0 |
| 0 | 0 |
| 0 | 0 |
| 0 | 1 |
| 0 | 0 |
| 0 | 0 |
| 0 | 0 |
| 0 | 0 |
| 0 | 0 |
| 0 | 0 |
| 0 | 0 |
| 0 | 0 |
| 0 | 0 |
| 0 | 0 |
| 0 | 0 |
| 0 | 0 |
| 0 | 0 |
| 1 | 0 |
| 0 | 0 |
| 0 | 1 |
| 0 | 0 |
| 0 | 0 |
| 0 | 0 |
| 0 | 0 |
| 0 | 0 |
| 0 | 0 |
| 0 | 0 |
| 0 | 0 |
| 0 | 0 |
| 0 | 0 |
| 0 | 0 |
| 0 | 0 |
| 0 | 0 |
| 0 | 0 |
| 0 | 0 |
| 0 | 1 |
| 0 | 1 |
| 0 | 0 |
| 0 | 0 |
| 0 | 0 |
| 0 | 0 |
| 0 | 0 |
| 1 | 0 |
| 0 | 1 |
| 0 | 0 |
| 0 | 0 |
| 0 | 0 |
| 0 | 1 |
| 0 | 1 |
| 0 | 1 |
| 0 | 1 |
| 0 | 0 |



|   |   |
|---|---|
| 0 | 1 |
| 0 | 0 |
| 0 | 0 |
| 1 | 1 |
| 0 | 0 |
| 1 | 1 |
| 0 | 0 |
| 0 | 0 |
| 1 | 1 |
| 0 | 1 |
| 0 | 1 |
| 0 | 0 |
| 0 | 0 |
| 1 | 1 |
| 0 | 0 |
| 0 | 1 |
| 0 | 0 |
| 1 | 1 |
| 0 | 1 |
| 0 | 1 |
| 0 | 1 |
| 1 | 1 |
| 0 | 0 |
| 0 | 0 |
| 0 | 1 |
| 1 | 1 |
| 1 | 1 |
| 0 | 1 |
| 0 | 0 |
| 0 | 0 |
| 1 | 1 |
| 1 | 1 |
| 0 | 0 |
| 0 | 0 |
| 0 | 0 |
| 1 | 1 |
| 1 | 1 |
| 0 | 1 |
| 0 | 0 |
| 0 | 0 |
| 1 | 1 |
| 1 | 1 |
| 0 | 1 |



|   |   |
|---|---|
| 0 | 0 |
| 0 | 0 |
| 0 | 0 |
| 0 | 0 |
| 0 | 0 |
| 1 | 1 |
| 0 | 0 |
| 0 | 0 |
| 0 | 0 |
| 0 | 0 |
| 0 | 0 |
| 0 | 0 |
| 0 | 0 |
| 0 | 0 |
| 0 | 0 |
| 0 | 0 |
| 0 | 0 |
| 0 | 0 |
| 0 | 0 |
| 0 | 0 |
| 0 | 0 |
| 0 | 0 |
| 0 | 0 |
| 1 | 1 |
| 0 | 0 |
| 0 | 0 |
| 0 | 0 |
| 0 | 0 |
| 0 | 0 |
| 0 | 0 |
| 0 | 0 |
| 0 | 0 |
| 0 | 0 |
| 0 | 0 |
| 0 | 0 |
| 0 | 0 |
| 0 | 0 |
| 1 | 1 |
| 1 | 1 |
| 0 | 0 |
| 0 | 0 |
| 0 | 0 |
| 0 | 0 |
| 1 | 1 |
| 0 | 0 |
| 0 | 0 |
| 0 | 0 |
| 1 | 1 |
| 1 | 1 |
| 1 | 1 |
| 1 | 1 |
| 0 | 0 |

|   |   |
|---|---|
| 1 | 1 |
| 0 | 0 |
| 0 | 0 |
| 1 | 1 |
| 0 | 0 |
| 1 | 1 |
| 0 | 0 |
| 0 | 0 |
| 1 | 1 |
| 1 | 1 |
| 1 | 1 |
| 0 | 0 |
| 0 | 0 |
| 1 | 1 |
| 0 | 0 |
| 1 | 1 |
| 0 | 0 |
| 1 | 1 |
| 1 | 1 |
| 1 | 1 |
| 1 | 1 |
| 1 | 1 |
| 1 | 0 |
| 0 | 0 |
| 0 | 0 |
| 1 | 1 |
| 1 | 1 |
| 1 | 1 |
| 1 | 1 |
| 0 | 0 |
| 0 | 0 |
| 1 | 1 |
| 1 | 1 |
| 0 | 0 |
| 0 | 0 |
| 0 | 0 |
| 1 | 1 |
| 1 | 0 |
| 1 | 1 |



|   |   |
|---|---|
| 0 | 0 |
| 0 | 0 |
| 0 | 0 |
| 0 | 0 |
| 0 | 0 |
| 1 | 1 |
| 0 | 0 |
| 0 | 0 |
| 0 | 0 |
| 0 | 0 |
| 0 | 0 |
| 0 | 0 |
| 0 | 0 |
| 0 | 0 |
| 0 | 0 |
| 0 | 0 |
| 0 | 0 |
| 0 | 0 |
| 0 | 0 |
| 0 | 0 |
| 0 | 0 |
| 0 | 0 |
| 1 | 1 |
| 0 | 0 |
| 0 | 0 |
| 0 | 0 |
| 0 | 0 |
| 0 | 0 |
| 0 | 0 |
| 0 | 0 |
| 0 | 0 |
| 0 | 0 |
| 0 | 0 |
| 0 | 0 |
| 0 | 0 |
| 0 | 0 |
| 0 | 0 |
| 0 | 0 |
| 1 | 1 |
| 1 | 1 |
| 0 | 0 |
| 0 | 0 |
| 0 | 0 |
| 0 | 0 |
| 0 | 0 |
| 1 | 1 |
| 0 | 0 |
| 0 | 0 |
| 0 | 0 |
| 1 | 1 |
| 1 | 1 |
| 1 | 1 |
| 1 | 1 |
| 0 | 0 |

|   |   |
|---|---|
| 1 | 1 |
| 0 | 0 |
| 0 | 0 |
| 1 | 0 |
| 0 | 0 |
| 1 | 1 |
| 0 | 0 |
| 0 | 0 |
| 1 | 1 |
| 1 | 1 |
| 1 | 1 |
| 0 | 0 |
| 0 | 0 |
| 1 | 1 |
| 0 | 0 |
| 1 | 1 |
| 0 | 0 |
| 1 | 1 |
| 1 | 1 |
| 1 | 1 |
| 1 | 1 |
| 1 | 1 |
| 0 | 0 |
| 0 | 0 |
| 1 | 1 |
| 1 | 1 |
| 1 | 1 |
| 1 | 1 |
| 0 | 0 |
| 0 | 0 |
| 1 | 1 |
| 1 | 1 |
| 0 | 0 |
| 0 | 0 |
| 0 | 0 |
| 1 | 1 |
| 1 | 1 |
| 1 | 1 |





|   |   |
|---|---|
| 0 | 0 |
| 0 | 0 |
| 0 | 0 |
| 0 | 0 |
| 0 | 0 |
| 1 | 1 |
| 0 | 0 |
| 0 | 0 |
| 0 | 0 |
| 0 | 0 |
| 0 | 0 |
| 0 | 0 |
| 0 | 0 |
| 0 | 0 |
| 0 | 0 |
| 0 | 0 |
| 0 | 0 |
| 0 | 0 |
| 0 | 0 |
| 0 | 0 |
| 0 | 0 |
| 1 | 1 |
| 0 | 0 |
| 0 | 0 |
| 0 | 0 |
| 0 | 0 |
| 0 | 0 |
| 0 | 0 |
| 0 | 0 |
| 0 | 0 |
| 0 | 0 |
| 0 | 0 |
| 0 | 0 |
| 0 | 0 |
| 0 | 0 |
| 1 | 1 |
| 1 | 1 |
| 0 | 0 |
| 0 | 0 |
| 0 | 0 |
| 0 | 0 |
| 1 | 1 |
| 0 | 0 |
| 0 | 0 |
| 0 | 0 |
| 1 | 1 |
| 1 | 1 |
| 1 | 1 |
| 1 | 1 |
| 0 | 0 |

|   |   |
|---|---|
| 1 | 1 |
| 0 | 0 |
| 0 | 0 |
| 1 | 1 |
| 0 | 0 |
| 1 | 1 |
| 0 | 0 |
| 0 | 0 |
| 1 | 1 |
| 1 | 1 |
| 1 | 1 |
| 0 | 0 |
| 0 | 0 |
| 1 | 1 |
| 0 | 0 |
| 1 | 1 |
| 0 | 0 |
| 1 | 1 |
| 1 | 1 |
| 1 | 1 |
| 1 | 1 |
| 1 | 1 |
| 0 | 0 |
| 0 | 0 |
| 1 | 1 |
| 1 | 1 |
| 1 | 1 |
| 1 | 1 |
| 0 | 0 |
| 0 | 0 |
| 1 | 1 |
| 1 | 1 |
| 0 | 0 |
| 0 | 0 |
| 0 | 0 |
| 1 | 1 |
| 1 | 1 |
| 1 | 1 |



|   |   |
|---|---|
| 0 | 0 |
| 0 | 0 |
| 0 | 0 |
| 0 | 0 |
| 0 | 0 |
| 1 | 1 |
| 0 | 0 |
| 0 | 0 |
| 0 | 0 |
| 0 | 0 |
| 0 | 0 |
| 0 | 0 |
| 0 | 0 |
| 0 | 0 |
| 0 | 0 |
| 0 | 0 |
| 0 | 0 |
| 0 | 0 |
| 0 | 0 |
| 0 | 0 |
| 0 | 0 |
| 0 | 0 |
| 0 | 0 |
| 1 | 1 |
| 0 | 0 |
| 0 | 0 |
| 0 | 0 |
| 0 | 0 |
| 0 | 0 |
| 0 | 0 |
| 0 | 0 |
| 0 | 0 |
| 0 | 0 |
| 0 | 0 |
| 0 | 0 |
| 0 | 0 |
| 0 | 0 |
| 1 | 1 |
| 1 | 1 |
| 0 | 0 |
| 0 | 0 |
| 0 | 0 |
| 0 | 0 |
| 1 | 1 |
| 0 | 0 |
| 0 | 0 |
| 0 | 0 |
| 1 | 1 |
| 1 | 1 |
| 1 | 1 |
| 1 | 1 |
| 0 | 0 |

|   |   |
|---|---|
| 1 | 1 |
| 0 | 0 |
| 0 | 0 |
| 1 | 1 |
| 0 | 0 |
| 1 | 1 |
| 0 | 0 |
| 0 | 0 |
| 1 | 1 |
| 1 | 1 |
| 1 | 1 |
| 0 | 0 |
| 0 | 0 |
| 1 | 1 |
| 0 | 0 |
| 1 | 1 |
| 0 | 0 |
| 1 | 1 |
| 1 | 1 |
| 1 | 1 |
| 1 | 1 |
| 1 | 1 |
| 0 | 0 |
| 0 | 0 |
| 1 | 1 |
| 1 | 1 |
| 1 | 1 |
| 1 | 1 |
| 0 | 0 |
| 0 | 0 |
| 1 | 1 |
| 1 | 1 |
| 0 | 0 |
| 0 | 0 |
| 0 | 0 |
| 1 | 1 |
| 1 | 1 |
| 1 | 1 |



|   |   |
|---|---|
| 0 | 0 |
| 0 | 0 |
| 0 | 0 |
| 0 | 0 |
| 0 | 0 |
| 1 | 1 |
| 0 | 0 |
| 0 | 0 |
| 0 | 0 |
| 0 | 0 |
| 0 | 0 |
| 0 | 0 |
| 0 | 0 |
| 0 | 0 |
| 0 | 0 |
| 0 | 0 |
| 0 | 0 |
| 0 | 0 |
| 0 | 0 |
| 0 | 0 |
| 0 | 0 |
| 0 | 0 |
| 0 | 0 |
| 1 | 1 |
| 0 | 0 |
| 0 | 0 |
| 0 | 0 |
| 0 | 0 |
| 0 | 0 |
| 0 | 0 |
| 0 | 0 |
| 0 | 0 |
| 0 | 0 |
| 0 | 0 |
| 0 | 0 |
| 0 | 0 |
| 0 | 0 |
| 0 | 0 |
| 0 | 0 |
| 1 | 1 |
| 1 | 1 |
| 0 | 0 |
| 0 | 0 |
| 0 | 0 |
| 0 | 0 |
| 0 | 0 |
| 1 | 1 |
| 0 | 0 |
| 0 | 0 |
| 0 | 0 |
| 1 | 1 |
| 1 | 1 |
| 1 | 1 |
| 1 | 1 |
| 0 | 0 |

|   |   |
|---|---|
| 1 | 1 |
| 0 | 0 |
| 0 | 0 |
| 1 | 1 |
| 0 | 0 |
| 1 | 1 |
| 0 | 0 |
| 0 | 0 |
| 1 | 1 |
| 1 | 1 |
| 1 | 1 |
| 0 | 0 |
| 0 | 0 |
| 1 | 1 |
| 0 | 0 |
| 1 | 1 |
| 0 | 0 |
| 1 | 1 |
| 1 | 1 |
| 1 | 1 |
| 1 | 1 |
| 1 | 1 |
| 0 | 0 |
| 0 | 0 |
| 1 | 1 |
| 1 | 1 |
| 1 | 1 |
| 1 | 1 |
| 0 | 0 |
| 0 | 0 |
| 1 | 1 |
| 1 | 1 |
| 0 | 0 |
| 0 | 0 |
| 0 | 0 |
| 1 | 1 |
| 1 | 1 |
| 1 | 1 |







|   |   |
|---|---|
| 1 | 1 |
| 0 | 0 |
| 0 | 0 |
| 1 | 1 |
| 0 | 0 |
| 1 | 1 |
| 0 | 0 |
| 0 | 0 |
| 1 | 1 |
| 1 | 1 |
| 1 | 1 |
| 0 | 0 |
| 1 | 1 |
| 1 | 1 |
| 1 | 1 |
| 0 | 0 |
| 1 | 1 |
| 1 | 1 |
| 1 | 1 |
| 1 | 1 |
| 1 | 1 |
| 0 | 0 |
| 0 | 0 |
| 1 | 1 |
| 1 | 1 |
| 1 | 1 |
| 1 | 1 |
| 0 | 0 |
| 0 | 0 |
| 1 | 1 |
| 1 | 1 |
| 0 | 0 |
| 0 | 0 |
| 0 | 0 |
| 1 | 1 |
| 1 | 1 |
| 1 | 1 |



|   |   |
|---|---|
| 0 | 0 |
| 0 | 0 |
| 0 | 0 |
| 0 | 0 |
| 0 | 0 |
| 1 | 1 |
| 0 | 0 |
| 0 | 0 |
| 0 | 0 |
| 0 | 0 |
| 0 | 0 |
| 0 | 0 |
| 0 | 0 |
| 0 | 0 |
| 0 | 0 |
| 0 | 0 |
| 0 | 0 |
| 0 | 0 |
| 1 | 1 |
| 0 | 0 |
| 1 | 1 |
| 0 | 0 |
| 0 | 0 |
| 0 | 0 |
| 0 | 0 |
| 0 | 0 |
| 0 | 0 |
| 0 | 0 |
| 0 | 0 |
| 0 | 0 |
| 0 | 0 |
| 0 | 0 |
| 0 | 0 |
| 0 | 0 |
| 1 | 1 |
| 1 | 1 |
| 0 | 0 |
| 0 | 0 |
| 0 | 0 |
| 0 | 0 |
| 0 | 0 |
| 1 | 1 |
| 1 | 1 |
| 1 | 1 |
| 1 | 1 |
| 1 | 1 |

|   |   |
|---|---|
| 1 | 1 |
| 0 | 0 |
| 0 | 0 |
| 1 | 1 |
| 0 | 0 |
| 1 | 1 |
| 0 | 0 |
| 0 | 0 |
| 1 | 1 |
| 1 | 1 |
| 1 | 1 |
| 0 | 0 |
| 1 | 1 |
| 1 | 1 |
| 1 | 1 |
| 0 | 0 |
| 1 | 1 |
| 1 | 1 |
| 1 | 1 |
| 1 | 1 |
| 1 | 1 |
| 0 | 0 |
| 0 | 0 |
| 1 | 1 |
| 1 | 1 |
| 1 | 1 |
| 1 | 1 |
| 0 | 0 |
| 0 | 0 |
| 1 | 1 |
| 1 | 1 |
| 0 | 0 |
| 0 | 0 |
| 0 | 0 |
| 1 | 1 |
| 1 | 1 |
| 1 | 1 |



|   |   |
|---|---|
| 0 | 0 |
| 0 | 0 |
| 0 | 0 |
| 0 | 0 |
| 0 | 0 |
| 1 | 1 |
| 0 | 0 |
| 0 | 0 |
| 0 | 0 |
| 0 | 0 |
| 0 | 0 |
| 0 | 0 |
| 0 | 0 |
| 0 | 0 |
| 0 | 0 |
| 0 | 0 |
| 0 | 0 |
| 0 | 0 |
| 0 | 0 |
| 0 | 0 |
| 1 | 1 |
| 0 | 0 |
| 1 | 1 |
| 0 | 0 |
| 0 | 0 |
| 0 | 0 |
| 0 | 0 |
| 0 | 0 |
| 0 | 0 |
| 0 | 0 |
| 0 | 0 |
| 0 | 0 |
| 0 | 0 |
| 0 | 0 |
| 0 | 0 |
| 0 | 0 |
| 0 | 0 |
| 1 | 1 |
| 1 | 1 |
| 0 | 0 |
| 0 | 0 |
| 0 | 0 |
| 1 | 1 |
| 1 | 1 |
| 1 | 1 |
| 1 | 1 |
| 1 | 1 |



|   |   |
|---|---|
| 1 | 1 |
| 0 | 0 |
| 0 | 0 |
| 1 | 1 |
| 0 | 0 |
| 1 | 1 |
| 0 | 0 |
| 0 | 0 |
| 1 | 0 |
| 1 | 1 |
| 1 | 1 |
| 0 | 0 |
| 1 | 1 |
| 1 | 0 |
| 1 | 1 |
| 1 | 1 |
| 0 | 0 |
| 1 | 0 |
| 1 | 1 |
| 1 | 1 |
| 1 | 1 |
| 1 | 1 |
| 0 | 0 |
| 0 | 0 |
| 1 | 1 |
| 1 | 1 |
| 1 | 1 |
| 1 | 1 |
| 0 | 0 |
| 0 | 0 |
| 1 | 1 |
| 1 | 1 |
| 0 | 0 |
| 0 | 0 |
| 0 | 0 |
| 1 | 1 |
| 1 | 1 |
| 1 | 1 |



|   |   |
|---|---|
| 0 | 0 |
| 0 | 0 |
| 0 | 0 |
| 0 | 0 |
| 0 | 0 |
| 1 | 1 |
| 0 | 0 |
| 0 | 0 |
| 0 | 0 |
| 0 | 0 |
| 0 | 0 |
| 0 | 0 |
| 0 | 0 |
| 0 | 0 |
| 0 | 0 |
| 0 | 0 |
| 0 | 0 |
| 0 | 0 |
| 0 | 0 |
| 0 | 0 |
| 1 | 1 |
| 0 | 0 |
| 1 | 1 |
| 0 | 0 |
| 0 | 0 |
| 0 | 0 |
| 0 | 0 |
| 0 | 0 |
| 0 | 0 |
| 0 | 0 |
| 0 | 0 |
| 0 | 0 |
| 0 | 0 |
| 0 | 0 |
| 0 | 0 |
| 0 | 0 |
| 0 | 0 |
| 0 | 0 |
| 0 | 0 |
| 0 | 0 |
| 1 | 1 |
| 1 | 1 |
| 0 | 0 |
| 0 | 0 |
| 0 | 0 |
| 0 | 0 |
| 1 | 1 |
| 1 | 1 |
| 1 | 1 |
| 1 | 1 |
| 1 | 1 |

|   |   |
|---|---|
| 1 | 1 |
| 0 | 0 |
| 0 | 0 |
| 1 | 1 |
| 0 | 0 |
| 1 | 1 |
| 0 | 0 |
| 0 | 0 |
| 0 | 0 |
| 1 | 1 |
| 1 | 1 |
| 0 | 0 |
| 1 | 1 |
| 0 | 0 |
| 1 | 1 |
| 1 | 1 |
| 0 | 0 |
| 0 | 0 |
| 1 | 1 |
| 1 | 1 |
| 1 | 1 |
| 1 | 1 |
| 0 | 0 |
| 0 | 0 |
| 1 | 1 |
| 1 | 1 |
| 1 | 1 |
| 1 | 1 |
| 0 | 0 |
| 0 | 0 |
| 1 | 1 |
| 1 | 1 |
| 0 | 0 |
| 0 | 0 |
| 0 | 0 |
| 1 | 1 |
| 1 | 1 |
| 1 | 1 |











|   |   |
|---|---|
| 1 | 1 |
| 1 | 1 |
| 1 | 1 |
| 1 | 1 |
| 1 | 1 |
| 0 | 0 |
| 1 | 1 |
| 1 | 1 |
| 1 | 1 |
| 1 | 1 |
| 1 | 1 |
| 1 | 1 |
| 1 | 1 |
| 1 | 1 |
| 1 | 1 |
| 1 | 1 |
| 1 | 1 |
| 1 | 1 |
| 1 | 1 |
| 0 | 0 |
| 1 | 1 |
| 0 | 0 |
| 1 | 1 |
| 1 | 1 |
| 1 | 1 |
| 1 | 1 |
| 1 | 1 |
| 1 | 1 |
| 1 | 1 |
| 1 | 1 |
| 1 | 1 |
| 1 | 1 |
| 1 | 1 |
| 1 | 1 |
| 1 | 1 |
| 1 | 1 |
| 0 | 0 |
| 0 | 0 |
| 1 | 1 |
| 1 | 1 |
| 1 | 1 |
| 0 | 0 |
| 0 | 0 |
| 1 | 1 |
| 1 | 1 |
| 1 | 1 |
| 0 | 0 |
| 0 | 0 |
| 0 | 0 |
| 0 | 0 |
| 0 | 0 |

|   |   |
|---|---|
| 0 | 0 |
| 1 | 1 |
| 1 | 1 |
| 0 | 0 |
| 1 | 1 |
| 0 | 0 |
| 0 | 0 |
| 1 | 1 |
| 0 | 0 |
| 0 | 0 |
| 0 | 0 |
| 1 | 1 |
| 0 | 0 |
| 0 | 0 |
| 0 | 0 |
| 1 | 1 |
| 0 | 0 |
| 0 | 0 |
| 0 | 0 |
| 0 | 0 |
| 1 | 1 |
| 1 | 1 |
| 0 | 0 |
| 0 | 0 |
| 0 | 0 |
| 0 | 0 |
| 1 | 1 |
| 1 | 1 |
| 0 | 0 |
| 0 | 0 |
| 1 | 1 |
| 1 | 1 |
| 1 | 1 |
| 0 | 0 |
| 0 | 0 |
| 0 | 0 |





















| Spoligo 43 | QUB-11b |
|------------|---------|
| 1          | 4       |
| 1          | 0       |
| 1          | 4       |
| 1          | 2       |
| 1          | 6       |
| 1          | 3       |
| 1          | 1       |
| 1          | 5       |
| 1          | 6       |
| 1          | 0       |
| 1          | 0       |
| 1          | 7       |
| 1          | 0       |
| 1          | 5       |
| 1          | 3       |
| 1          | 3       |
| 1          | 3       |
| 1          | 4       |
| 1          | 4       |
| 1          | 6       |
| 1          | 4       |
| 1          | 2       |
| 1          | 3       |
| 1          | 4       |
| 1          | 7       |
| 1          | 2       |
| 1          | 7       |
| 1          | 5       |
| 1          | 5       |
| 1          | 2       |
| 1          | 4       |
| 1          | 4       |
| 1          | 6       |
| 1          | 4       |
| 1          | 7       |
| 1          | 3       |
| 1          | 6       |
| 1          | 5       |
| 1          | 6       |
| 1          | 5       |
| 1          | 10      |
| 1          | 6       |
| 1          | 6       |
| 1          | 6       |
| 1          | 6       |
| 1          | 6       |

|   |   |
|---|---|
| 1 | 6 |
| 1 | 6 |
| 1 | 6 |
| 1 | 6 |
| 1 | 6 |
| 1 | 2 |
| 1 | 6 |
| 1 | 6 |
| 1 | 6 |
| 1 | 7 |
| 1 | 4 |
| 1 | 6 |
| 1 | 6 |
| 1 | 6 |
| 1 | 7 |
| 1 | 7 |
| 1 | 6 |
| 1 | 6 |
| 1 | 0 |
| 1 | 5 |
| 1 | 2 |
| 1 | 6 |
| 1 | 6 |
| 1 | 5 |
| 1 | 6 |
| 1 | 6 |
| 1 | 5 |
| 1 | 6 |
| 1 | 5 |
| 1 | 5 |
| 1 | 6 |
| 1 | 5 |
| 1 | 2 |
| 1 | 2 |
| 1 | 5 |
| 1 | 6 |
| 1 | 6 |
| 1 | 3 |
| 1 | 2 |
| 1 | 5 |
| 1 | 6 |
| 1 | 7 |
| 1 | 3 |
| 1 | 3 |
| 1 | 3 |
| 1 | 3 |
| 1 | 0 |

|   |   |
|---|---|
| 1 | 3 |
| 1 | 6 |
| 1 | 6 |
| 1 | 3 |
| 1 | 5 |
| 1 | 4 |
| 1 | 7 |
| 1 | 6 |
| 1 | 4 |
| 1 | 3 |
| 1 | 3 |
| 1 | 6 |
| 1 | 0 |
| 1 | 4 |
| 1 | 0 |
| 1 | 3 |
| 1 | 6 |
| 1 | 4 |
| 1 | 3 |
| 1 | 3 |
| 1 | 3 |
| 1 | 1 |
| 1 | 6 |
| 1 | 7 |
| 1 | 2 |
| 1 | 1 |
| 1 | 2 |
| 1 | 6 |
| 1 | 7 |
| 1 | 4 |
| 1 | 4 |
| 1 | 4 |
| 1 | 3 |
| 1 | 3 |
| 1 | 7 |
| 1 | 5 |
| 1 | 6 |
| 1 | 3 |
| 1 | 3 |
| 1 | 3 |

| QUB-18 | QUB-26 |
|--------|--------|
| 5      | 7      |
| 10     | 9      |
| 5      | 6      |
| 5      | 11     |
| 8      | 8      |
| 5      | 11     |
| 8      | 9      |
| 8      | 8      |
| 7      | 8      |
| 0      | 4      |
| 0      | 4      |
| 10     | 7      |
| 0      | 4      |
| 8      | 7      |
| 5      | 8      |
| 7      | 11     |
| 0      | 4      |
| 0      | 6      |
| 10     | 3      |
| 10     | 8      |
| 10     | 7      |
| 5      | 5      |
| 5      | 10     |
| 8      | 7      |
| 5      | 8      |
| 5      | 9      |
| 10     | 8      |
| 7      | 8      |
| 8      | 8      |
| 2      | 6      |
| 3      | 5      |
| 5      | 4      |
| 8      | 8      |
| 9      | 8      |
| 10     | 9      |
| 5      | 4      |
| 6      | 7      |
| 8      | 8      |
| 10     | 9      |
| 10     | 8      |
| 10     | 2      |
| 3      | 8      |
| 3      | 8      |
| 3      | 8      |
| 3      | 8      |
| 8      | 8      |

|    |    |
|----|----|
| 3  | 8  |
| 3  | 8  |
| 3  | 8  |
| 3  | 8  |
| 3  | 8  |
| 5  | 12 |
| 3  | 8  |
| 3  | 8  |
| 3  | 1  |
| 6  | 7  |
| 8  | 8  |
| 3  | 8  |
| 3  | 8  |
| 3  | 8  |
| 6  | 7  |
| 10 | 2  |
| 3  | 8  |
| 3  | 8  |
| 0  | 4  |
| 8  | 8  |
| 6  | 12 |
| 3  | 8  |
| 3  | 8  |
| 8  | 8  |
| 10 | 8  |
| 3  | 1  |
| 6  | 8  |
| 10 | 8  |
| 10 | 7  |
| 8  | 8  |
| 3  | 8  |
| 6  | 8  |
| 5  | 11 |
| 6  | 12 |
| 8  | 8  |
| 3  | 8  |
| 3  | 8  |
| 0  | 4  |
| 5  | 11 |
| 8  | 8  |
| 3  | 8  |
| 10 | 7  |
| 4  | 12 |
| 4  | 12 |
| 4  | 12 |
| 4  | 12 |
| 0  | 2  |



|    |    |
|----|----|
| 4  | 12 |
| 10 | 7  |
| 10 | 7  |
| 9  | 8  |
| 12 | 8  |
| 6  | 5  |
| 11 | 8  |
| 11 | 8  |
| 5  | 9  |
| 4  | 12 |
| 4  | 12 |
| 8  | 8  |
| 0  | 2  |
| 5  | 9  |
| 0  | 2  |
| 4  | 12 |
| 10 | 7  |
| 5  | 9  |
| 4  | 12 |
| 4  | 2  |
| 6  | 5  |
| 9  | 6  |
| 12 | 2  |
| 12 | 7  |
| 1  | 1  |
| 9  | 8  |
| 4  | 8  |
| 5  | 11 |
| 9  | 8  |
| 11 | 7  |
| 5  | 8  |
| 5  | 3  |
| 12 | 9  |
| 2  | 3  |
| 9  | 8  |
| 12 | 9  |
| 12 | 8  |
| 5  | 9  |
| 10 | 6  |
| 5  | 0  |





|   |   |
|---|---|
| 2 | 4 |
| 1 | 2 |
| 1 | 2 |
| 3 | 2 |
| 2 | 4 |
| 2 | 3 |
| 4 | 0 |
| 4 | 4 |
| 2 | 3 |
| 2 | 4 |
| 2 | 4 |
| 2 | 4 |
| 2 | 4 |
| 2 | 3 |
| 2 | 4 |
| 2 | 4 |
| 1 | 2 |
| 2 | 3 |
| 2 | 4 |
| 2 | 4 |
| 2 | 4 |
| 2 | 4 |
| 3 | 4 |
| 4 | 2 |
| 4 | 2 |
| 2 | 4 |
| 3 | 2 |
| 2 | 4 |
| 2 | 4 |
| 2 | 4 |
| 4 | 2 |
| 2 | 4 |
| 2 | 4 |
| 4 | 4 |
| 2 | 4 |
| 2 | 4 |
| 3 | 4 |
| 6 | 4 |
| 2 | 3 |
| 3 | 4 |
| 2 | 4 |

| MIRU26 | MIRU31 |
|--------|--------|
| 4      | 3      |
| 8      | 5      |
| 5      | 3      |
| 7      | 4      |
| 8      | 5      |
| 7      | 3      |
| 1      | 3      |
| 8      | 5      |
| 8      | 5      |
| 5      | 3      |
| 5      | 3      |
| 8      | 5      |
| 5      | 3      |
| 8      | 5      |
| 3      | 3      |
| 6      | 3      |
| 3      | 3      |
| 5      | 3      |
| 7      | 3      |
| 7      | 5      |
| 7      | 4      |
| 7      | 3      |
| 8      | 3      |
| 7      | 5      |
| 5      | 3      |
| 6      | 4      |
| 5      | 5      |
| 6      | 5      |
| 7      | 5      |
| 5      | 3      |
| 5      | 3      |
| 5      | 5      |
| 7      | 5      |
| 5      | 6      |
| 5      | 4      |
| 5      | 3      |
| 5      | 5      |
| 7      | 5      |
| 5      | 5      |
| 7      | 5      |
| 9      | 5      |
| 8      | 5      |
| 8      | 5      |
| 8      | 5      |
| 8      | 5      |
| 8      | 5      |

|   |   |
|---|---|
| 8 | 5 |
| 8 | 5 |
| 8 | 5 |
| 8 | 5 |
| 8 | 5 |
| 4 | 3 |
| 8 | 5 |
| 8 | 5 |
| 8 | 5 |
| 7 | 5 |
| 7 | 5 |
| 8 | 5 |
| 8 | 5 |
| 8 | 5 |
| 7 | 5 |
| 8 | 5 |
| 8 | 5 |
| 8 | 5 |
| 6 | 3 |
| 8 | 5 |
| 7 | 2 |
| 8 | 5 |
| 8 | 5 |
| 8 | 5 |
| 8 | 5 |
| 7 | 5 |
| 8 | 5 |
| 8 | 5 |
| 8 | 5 |
| 8 | 5 |
| 8 | 5 |
| 8 | 5 |
| 8 | 5 |
| 8 | 5 |
| 8 | 5 |
| 8 | 5 |
| 8 | 5 |
| 8 | 5 |
| 7 | 3 |
| 7 | 2 |
| 6 | 5 |
| 8 | 5 |
| 8 | 5 |
| 5 | 3 |
| 6 | 3 |
| 8 | 5 |
| 8 | 5 |
| 8 | 5 |
| 7 | 3 |
| 7 | 3 |
| 7 | 3 |
| 7 | 3 |
| 6 | 3 |

|    |   |
|----|---|
| 7  | 3 |
| 6  | 5 |
| 6  | 5 |
| 6  | 3 |
| 4  | 5 |
| 6  | 2 |
| 7  | 8 |
| 8  | 5 |
| 8  | 2 |
| 4  | 3 |
| 7  | 3 |
| 7  | 5 |
| 6  | 3 |
| 4  | 2 |
| 7  | 3 |
| 8  | 3 |
| 7  | 5 |
| 4  | 2 |
| 8  | 3 |
| 8  | 3 |
| 8  | 4 |
| 2  | 3 |
| 8  | 5 |
| 10 | 5 |
| 4  | 3 |
| 2  | 3 |
| 7  | 4 |
| 10 | 3 |
| 8  | 4 |
| 10 | 5 |
| 6  | 3 |
| 5  | 3 |
| 10 | 5 |
| 6  | 3 |
| 10 | 7 |
| 7  | 5 |
| 7  | 5 |
| 3  | 3 |
| 1  | 3 |
| 7  | 3 |





|   |   |
|---|---|
| 3 | 3 |
| 3 | 3 |
| 3 | 3 |
| 3 | 3 |
| 3 | 3 |
| 2 | 3 |
| 3 | 3 |
| 3 | 3 |
| 3 | 3 |
| 1 | 4 |
| 3 | 3 |
| 3 | 3 |
| 3 | 3 |
| 3 | 3 |
| 1 | 4 |
| 3 | 3 |
| 3 | 3 |
| 3 | 3 |
| 2 | 2 |
| 3 | 4 |
| 2 | 3 |
| 3 | 3 |
| 3 | 3 |
| 3 | 4 |
| 2 | 3 |
| 3 | 3 |
| 3 | 3 |
| 2 | 3 |
| 3 | 3 |
| 3 | 4 |
| 3 | 3 |
| 3 | 3 |
| 2 | 2 |
| 2 | 3 |
| 3 | 4 |
| 3 | 3 |
| 3 | 3 |
| 2 | 2 |
| 2 | 2 |
| 3 | 4 |
| 3 | 3 |
| 3 | 3 |
| 2 | 3 |
| 2 | 3 |
| 2 | 3 |
| 2 | 3 |
| 2 | 4 |

|   |   |
|---|---|
| 2 | 3 |
| 3 | 3 |
| 3 | 3 |
| 4 | 4 |
| 3 | 3 |
| 2 | 3 |
| 3 | 3 |
| 3 | 1 |
| 2 | 3 |
| 2 | 3 |
| 2 | 3 |
| 3 | 3 |
| 2 | 2 |
| 2 | 3 |
| 2 | 2 |
| 2 | 3 |
| 3 | 3 |
| 2 | 3 |
| 2 | 3 |
| 2 | 3 |
| 2 | 3 |
| 2 | 3 |
| 5 | 2 |
| 3 | 3 |
| 3 | 3 |
| 2 | 3 |
| 5 | 2 |
| 2 | 3 |
| 2 | 3 |
| 3 | 4 |
| 3 | 3 |
| 2 | 3 |
| 2 | 3 |
| 3 | 3 |
| 2 | 3 |
| 3 | 3 |
| 3 | 3 |
| 3 | 5 |
| 2 | 3 |
| 5 | 2 |
| 2 | 3 |

| Mtub21 | Mtub04 |
|--------|--------|
| 3      | 2      |
| 5      | 4      |
| 3      | 2      |
| 3      | 2      |
| 4      | 2      |
| 2      | 2      |
| 3      | 3      |
| 5      | 4      |
| 5      | 4      |
| 1      | 4      |
| 1      | 4      |
| 4      | 4      |
| 1      | 4      |
| 4      | 3      |
| 3      | 2      |
| 2      | 3      |
| 1      | 2      |
| 1      | 3      |
| 3      | 2      |
| 5      | 4      |
| 4      | 4      |
| 3      | 2      |
| 3      | 1      |
| 5      | 4      |
| 3      | 2      |
| 3      | 2      |
| 2      | 4      |
| 5      | 4      |
| 5      | 3      |
| 3      | 5      |
| 3      | 2      |
| 3      | 2      |
| 5      | 5      |
| 4      | 3      |
| 4      | 3      |
| 2      | 3      |
| 2      | 4      |
| 5      | 4      |
| 4      | 4      |
| 4      | 4      |
| 4      | 4      |
| 8      | 4      |
| 8      | 4      |
| 8      | 4      |
| 8      | 4      |
| 5      | 5      |

|   |   |
|---|---|
| 8 | 4 |
| 8 | 4 |
| 8 | 4 |
| 8 | 4 |
| 8 | 4 |
| 3 | 2 |
| 8 | 4 |
| 8 | 4 |
| 8 | 4 |
| 4 | 4 |
| 5 | 3 |
| 8 | 4 |
| 8 | 4 |
| 8 | 4 |
| 4 | 4 |
| 4 | 4 |
| 8 | 4 |
| 8 | 4 |
| 1 | 4 |
| 7 | 4 |
| 3 | 2 |
| 8 | 4 |
| 8 | 4 |
| 7 | 4 |
| 4 | 2 |
| 8 | 4 |
| 5 | 4 |
| 4 | 2 |
| 4 | 4 |
| 7 | 4 |
| 8 | 4 |
| 5 | 4 |
| 3 | 2 |
| 3 | 2 |
| 7 | 4 |
| 8 | 4 |
| 8 | 4 |
| 1 | 4 |
| 3 | 2 |
| 7 | 4 |
| 8 | 4 |
| 4 | 4 |
| 2 | 1 |
| 2 | 1 |
| 2 | 1 |
| 2 | 1 |
| 1 | 4 |

|   |   |
|---|---|
| 2 | 1 |
| 1 | 4 |
| 1 | 4 |
| 3 | 2 |
| 5 | 4 |
| 3 | 2 |
| 4 | 4 |
| 4 | 4 |
| 3 | 2 |
| 2 | 1 |
| 2 | 1 |
| 5 | 4 |
| 1 | 4 |
| 3 | 2 |
| 1 | 4 |
| 2 | 1 |
| 1 | 4 |
| 3 | 2 |
| 2 | 1 |
| 2 | 1 |
| 3 | 3 |
| 3 | 3 |
| 4 | 4 |
| 4 | 4 |
| 3 | 2 |
| 2 | 3 |
| 3 | 2 |
| 3 | 1 |
| 5 | 4 |
| 4 | 4 |
| 3 | 2 |
| 2 | 2 |
| 5 | 4 |
| 3 | 2 |
| 5 | 4 |
| 4 | 3 |
| 4 | 3 |
| 3 | 2 |
| 3 | 3 |
| 2 | 2 |

| ETR-F |
|-------|
| 0     |
| 2     |
| 1     |
| 0     |
| 2     |
| 1     |
| 0     |
| 2     |
| 0     |
| 1     |
| 1     |
| 2     |
| 1     |
| 1     |
| 1     |
| 1     |
| 2     |
| 2     |
| 2     |
| 2     |
| 2     |
| 2     |
| 2     |
| 1     |
| 1     |
| 2     |
| 1     |
| 0     |
| 2     |
| 2     |
| 2     |
| 1     |
| 0     |
| 1     |
| 2     |
| 1     |
| 3     |
| 2     |
| 2     |
| 2     |
| 2     |
| 3     |
| 1     |
| 2     |
| 2     |
| 2     |
| 2     |
| 3     |
| 3     |

|   |
|---|
| 2 |
| 2 |
| 2 |
| 2 |
| 2 |
| 1 |
| 2 |
| 2 |
| 2 |
| 1 |
| 2 |
| 2 |
| 1 |
| 2 |
| 2 |
| 2 |
| 2 |
| 1 |
| 1 |
| 2 |
| 2 |
| 2 |
| 0 |
| 1 |
| 2 |
| 2 |
| 2 |
| 2 |
| 2 |
| 2 |
| 2 |
| 2 |
| 2 |
| 2 |
| 2 |
| 2 |
| 2 |
| 2 |
| 2 |
| 2 |
| 2 |
| 1 |
| 2 |
| 2 |
| 2 |
| 3 |
| 2 |
| 2 |
| 1 |
| 1 |
| 1 |
| 1 |
| 3 |

|   |
|---|
| 1 |
| 2 |
| 2 |
| 2 |
| 2 |
| 1 |
| 2 |
| 2 |
| 1 |
| 1 |
| 1 |
| 1 |
| 3 |
| 1 |
| 3 |
| 1 |
| 2 |
| 1 |
| 1 |
| 1 |
| 1 |
| 1 |
| 1 |
| 2 |
| 0 |
| 1 |
| 1 |
| 1 |
| 1 |
| 2 |
| 2 |
| 1 |
| 1 |
| 2 |
| 0 |
| 1 |
| 3 |
| 2 |
| 1 |
| 1 |
| 0 |
